# Supplementary material for: A Novel Microbial Consortia Catalysis Strategy for the Production of Hydroxytyrosol from Tyrosine
Source: MDPI journal article supplement (doi:10.3390/ijms24086944), 2023-04-08
Supplement: s1 [file s1]

## **Supplementary Material**

# **A Novel Microbial Consortia Catalysis Strategy for the Production of Hydroxytyrosol from Tyrosine**

**Pengfei Gong, Jiali Tang, Jiaying Wang, Chengtao Wang \* and Wei Chen \***

Key Laboratory of Geriatric Nutrition and Health, Ministry of Education, Beijing

Advanced Innovation Center for Food Nutrition and Human Health, Beijing

Engineering and Technology Research Center of Food Additives, School of Food

and Health, Beijing Technology and Business University, Beijing 100048, China

\* Correspondence: wangchengtao@th.btbu.edu.cn (C.W.); weichen@btbu.edu.cn

(W.C.)

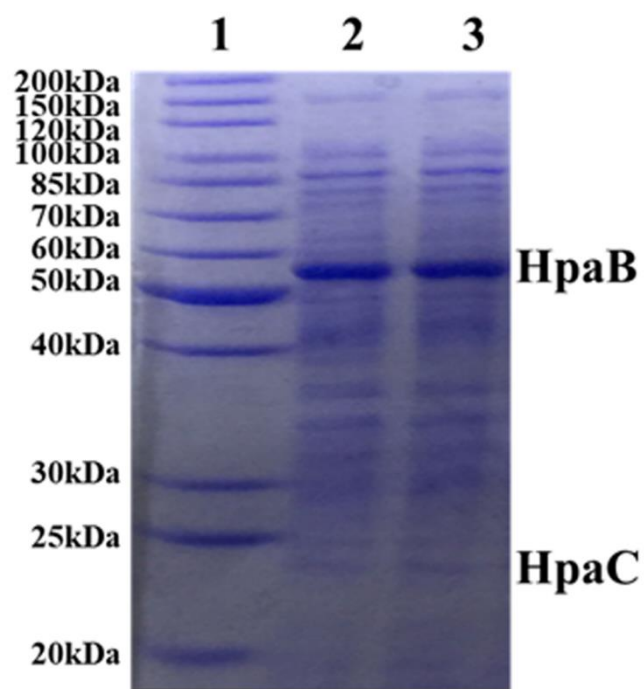

**Figure S1. Protein expression of HpaBC.** Lane 1 shows the Protein Marker. Lane 2 and 3 show the cell lysate of strain BL21(DE3) harboring plasmid pET28a-*hpaBC*, after culture and induction.

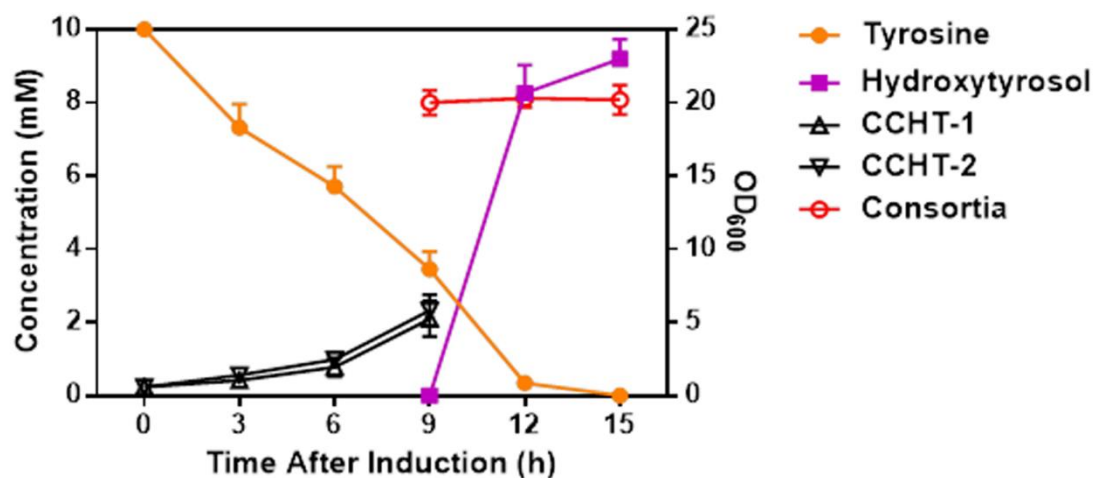

**Figure S2. Growth curves of strains.** The time-course of separate strains and the consortia. The orange closed circle represents the time course of tyrosine concentration, the purple square represents the time course of hydroxytyrosol concentration, the hollow black equilateral triangle, inverted triangle, and red cycle represents the time course of the OD<sub>600</sub> of the CCHT-1, CCHT-2 and consortia respectively. Data are expressed as the mean  $\pm$  SD (n = 3).

**Table S1 Plasmids used in this study.**

| Plasmids                                         | Description                                                       | source     |
|--------------------------------------------------|-------------------------------------------------------------------|------------|
| pFA1A                                            | Plasmid with p15A replication origin, <i>amp</i> <sup>+</sup>     | [35]       |
| pRSF                                             | Plasmid with pRSF3010 replication origin, <i>kan</i> <sup>+</sup> | [35]       |
| pRSF- <i>hpaBC-tyrB<sub>EC</sub>-abpdc-par</i>   | Pathway constructed in pRSF                                       | This study |
| pRSF- <i>hpaBC-aspC<sub>EC</sub>-abpdc-par</i>   | Pathway constructed in pRSF                                       | This study |
| pRSF- <i>hpaBC-tyrB<sub>PA</sub>-abpdc-par</i>   | Pathway constructed in pRSF                                       | This study |
| pRSF- <i>hpaBC-phhC<sub>PA</sub>-abpdc-par</i>   | Pathway constructed in pRSF                                       | This study |
| pRSF- <i>hpaBC-tyrB<sub>PP</sub>-abpdc-par</i>   | Pathway constructed in pRSF                                       | This study |
| pRSF- <i>hpaBC-tyrB<sub>EC</sub>-aro10-par</i>   | Pathway constructed in pRSF                                       | This study |
| pRSF- <i>hpaBC-tyrB<sub>EC</sub>-aro8-par</i>    | Pathway constructed in pRSF                                       | This study |
| pRSF- <i>hpaBC-tyrB<sub>EC</sub>-synKDC4-par</i> | Pathway constructed in pRSF                                       | This study |
| pRSF- <i>hpaBC-tyrB<sub>EC</sub>-abpdc-yqhD</i>  | Pathway constructed in pRSF                                       | This study |
| pRSF- <i>hpaBC-tyrB<sub>EC</sub>-abpdc-yjgB</i>  | Pathway constructed in pRSF                                       | This study |
| pRSF- <i>hpaBC-tyrB<sub>EC</sub>-abpdc-dkgB</i>  | Pathway constructed in pRSF                                       | This study |
| pRSF- <i>hpaBC-tyrB<sub>EC</sub>-abpdc-yahK</i>  | Pathway constructed in pRSF                                       | This study |
| pRSF- <i>hpaBC-tyrB<sub>EC</sub>-abpdc-calA</i>  | Pathway constructed in pRSF                                       | This study |
| pRSF- <i>hpaBC-tyrB<sub>EC</sub>-abpdc-adh1</i>  | Pathway constructed in pRSF                                       | This study |
| pRSF- <i>gdhA-tyrB<sub>EC</sub>-abpdc-par</i>    | Co-culture plasmid                                                | This study |
| pFA1A- <i>gdhA</i>                               | Co-culture plasmid                                                | This study |
| pFA1A- <i>hpaBC</i>                              | Co-culture plasmid                                                | This study |
| pET28a- <i>hpaBC</i>                             | HpaBC expressed from pET28a vector                                | This study |

**Table S2 Primers used in this study.**

| Primers                       | Sequence (5'-3')                         |
|-------------------------------|------------------------------------------|
| <i>hpaB</i> -for              | GCTAACAGGAGGAATTACATATGAAACCAGAAGATTTC   |
| <i>hpaC</i> -rev              | TGAAACATATTGTTTCTCCTTTAAATCGCAGCTTCCATT  |
| <i>tyrB<sub>EC</sub></i> -for | CGATTAAAGGAGAAACAATATGTTTCAAAAAGTTGACGC  |
| <i>tyrB<sub>EC</sub></i> -rev | TTCGCCATATTGTTTCTCCTTTACATCACCGCAGCAAACG |
| <i>abpdc</i> -for             | TGATGTAAAGGAGAAACAATATGGCGAAACTGGCGGAAGC |
| <i>abpdc</i> -rev             | TTGCTCATATTGTTTCTCCTTTATTGCGGAGGTGCCGCAT |
| <i>par</i> -for               | GCGAATAAAGGAGAAACAATATGAGCAATAAAGTGGTGTG |
| <i>par</i> -rev               | CGGAAATCTTCTGGTTTCATTTAAAAGCTCACAATGCTTT |
| pRSF-for                      | AGATCTGGTACTAGTGGTGA                     |
| pRSF-rev                      | CGGAAATCTTCTGGTTTCAT                     |
| <i>aspC<sub>EC</sub></i> -for | CGATTAAAGGAGAAACAATATGTTTGAGAACATTACCGC  |
| <i>aspC<sub>EC</sub></i> -rev | TTCGCCATATTGTTTCTCCTTTACAGCACTGCCACAATCG |
| <i>tyrB<sub>PA</sub></i> -for | CGATTAAAGGAGAAACAATATGAGTCTGTTTTCTGCCGT  |
| <i>tyrB<sub>PA</sub></i> -rev | TTCGCCATATTGTTTCTCCTCTACAGGACCTGGACGATGG |
| <i>phhC<sub>PA</sub></i> -for | CGATTAAAGGAGAAACAATATGAGTCATTTGCGCAAGGT  |
| <i>phhC<sub>PA</sub></i> -rev | TTCGCCATATTGTTTCTCCTTCAGTCCGCGCAGACCTGGG |
| <i>tyrB<sub>PP</sub></i> -for | CGATTAAAGGAGAAACAATATGTTCAAACATGTCGATGC  |
| <i>tyrB<sub>PP</sub></i> -rev | TTCGCCATATTGTTTCTCCTTTACTTCTGAACGGCAGCGA |
| <i>aro10</i> -for             | TGATGTAAAGGAGAAACAATATGGCACCTGTTACAATTGA |
| <i>aro10</i> -rev             | TTGCTCATATTGTTTCTCCTCTATTTTTTATTTCTTTTAA |
| <i>aro8</i> -for              | TGATGTAAAGGAGAAACAATATGACTTTACCTGAATCAAA |
| <i>aro8</i> -rev              | TTGCTCATATTGTTTCTCCTCTATTTGGAAATACCAAATT |
| <i>adh1</i> -for              | TGATGTAAAGGAGAAACAATATGTCTATCCCAGAAACTCA |
| <i>adh1</i> -rev              | TTGCTCATATTGTTTCTCCTTTATTTAGAAGTGTCAACAA |
| <i>synKDC4</i> -for           | TGATGTAAAGGAGAAACAATATGGCGCCGGTGAAACAGGA |

|                     |                                           |
|---------------------|-------------------------------------------|
| <i>synKDC4</i> -rev | TTGCTCATATTGTTTCTCCTTTAATGAATGCTTTTACTCG  |
| <i>yqhD</i> -for    | GCGAATAAAGGAGAAACAATATGAACAACCTTTAATCTGCA |
| <i>yqhD</i> -rev    | CGGAAATCTTCTGGTTTCATTTAGCGGGCGGCTTCGTATA  |
| <i>yjgB</i> -for    | GCGAATAAAGGAGAAACAATATGTCGATGATAAAAAGCTA  |
| <i>yjgB</i> -rev    | CGGAAATCTTCTGGTTTCATTCAAAAATCGGCTTTCAACA  |
| <i>dkgB</i> -for    | GCGAATAAAGGAGAAACAATATGGCTATCCCTGCATTG    |
| <i>dkgB</i> -rev    | CGGAAATCTTCTGGTTTCATTTAATCCCATTCAGGAGCCA  |
| <i>yahK</i> -for    | GCGAATAAAGGAGAAACAATATGAAGATCAAAGCTGTTGG  |
| <i>yahK</i> -rev    | CGGAAATCTTCTGGTTTCATTCACTCTGTTAGTGTCGAT   |
| <i>calA</i> -for    | GCGAATAAAGGAGAAACAATATGCAGCTGACCAACAAAAA  |
| <i>calA</i> -rev    | CGGAAATCTTCTGGTTTCATTTACACGTAGGTGCTGGCCA  |
| <i>gdhA</i> -for    | GCTAACAGGAGGAATTACATATGGATCAGACATATTCTCT  |
| <i>gdhA</i> -rev    | TGAAACATATTGTTTCTCCTTTAAATCACACCCTGCGCCA  |
| <i>hpaBC</i> -for-1 | GCTAACAGGAGGAATTACATATGAAACCAGAAGATTTC    |
| <i>hpaBC</i> -rev-1 | CGGAAATCTTCTGGTTTCATTTAAATCGCAGCTTCCATT   |
| <i>gdhA</i> -for-1  | GCTAACAGGAGGAATTACATATGGATCAGACATATTCTCT  |
| <i>gdhA</i> -rev-1  | CGGAAATCTTCTGGTTTCATTTAAATCACACCCTGCGCCA  |
| <i>hpaB</i> -for-1  | TGGTGGTGGTGGTGCTCGAGTTAAATCGCAGCTTCCATT   |
| <i>hpaC</i> -rev-1  | TGGTGCCGCGCGGCAGCCATATGAAACCAGAAGATTTC    |
| vector-for          | CGGAAATCTTCTGGTTTCATATGGCTGCCGCGCGGCACCA  |
| vector-rev          | AAATGGAAGCTGCGATTAACTCGAGCACCACCACCA      |

---

**Table S3 Sequence of genes after codon optimization.**

| Gene name    | DNA sequence after codon optimization                                                                                                                                                                                                                                                                                                                                                                                                                                                                                                                                                                                                                                                                                                                                                                                                                                                                                                                                                                                                                                                                                                                                                                                                                                                                                                                                                                                                                                                                                                                                                                                                                                                                                                                                                                                                                  |
|--------------|--------------------------------------------------------------------------------------------------------------------------------------------------------------------------------------------------------------------------------------------------------------------------------------------------------------------------------------------------------------------------------------------------------------------------------------------------------------------------------------------------------------------------------------------------------------------------------------------------------------------------------------------------------------------------------------------------------------------------------------------------------------------------------------------------------------------------------------------------------------------------------------------------------------------------------------------------------------------------------------------------------------------------------------------------------------------------------------------------------------------------------------------------------------------------------------------------------------------------------------------------------------------------------------------------------------------------------------------------------------------------------------------------------------------------------------------------------------------------------------------------------------------------------------------------------------------------------------------------------------------------------------------------------------------------------------------------------------------------------------------------------------------------------------------------------------------------------------------------------|
| <i>abpdc</i> | ATGGCGAAACTGGCGGAAGCCCTGCTGCGCGCCCTGAAAGATCGTG<br>GCGCGCAGGCCATGTTTCGGCATCCCGGGCGATTTCGCGCTGCCTTTT<br>TTTAAAGTGGCGGAAGAAACCCAGATTCTGCCGCTGCACACCCTGAG<br>CCACGAACCGGCCGTGGGCTTCGCCGCCGATGCGGCCGCGCGCTA<br>CTCGGCGACCCTGGGTGTTGCGGGCGTAACGTACGGAGCCGGTGCG<br>TTTAATATGGTCAATGCCGTTGCGGGTGCGTACGCGGAAAAAAGCCC<br>GGTGGTTGTTATTAGTGGTGCGCCGGGTACCACCGAAGGCAACGCG<br>GGTCTGCTGCTGCACCATCAGGGCCGCACCCTGGATACCCAGTTCCA<br>GGTTTTCAAAGAAATCACCGTGGCGCAGGCCCGCCTGGATGATCCGG<br>CAAAAGCGCCGGCCGAGATCGCCCGCGTGCTGGGCGCCGCGCGCG<br>CGTTAAGCCGCCCGGTGTATCTGGAAATTCGCGTAACATGGTGAATG<br>CCGAAGTGGAACCGGTGGGCGATGATCCGGCATGGCCGGTGGACCG<br>TGATGCACTGGCGGCCTGCGCCGACGAAGTGTTAGCAGCAATGCGC<br>GCCGCGACCTCACCTGTTCTGATGGTGTGCGTTGAAGTGCGTCGTTA<br>TGGTCTGGAAGCGAAAGTGGCGGAACTGGCGCAGCGTCTGGGCGT<br>GCCGGTGGTTACCACCTTCATGGGCCGCGGGCTGCTGGCAGATGCG<br>CCGACCCCGCCGCTGGGCACCTATATTGGCGTGGCCGGCGATGCGG<br>AAATTACCCGTCTGGTTGAAGAAAGCGATGGTCTGTTTCTGCTGGGT<br>GCAATTCTGTCAGATACGAATTTTTCGGTTAGCCAGCGTAAAATTGATT<br>TACGTAAAACCATTTCATGCGTTTGATCGTGCGGTGACCCTGGGCTATC<br>ATACCTATGCTGATATTCCGCTGGATGGTCTGGTGGATGCCCTGTTGG<br>AACGCCTGCCGCCGAGCGACCGTACCACCCGTGGCAAAGAACCGCA<br>TGCGTATCCGACTGGCCTGCAAGCGGATGGCGAACCGATTGCCCCGA<br>TGGATATTGCGCGCGCGGTCAATGATCGTGTGCGTGCGGGCCAGGA<br>ACCGCTGCTGATTGCCGCAGACATGGGCGATTGCCTGTTTACCGCGA<br>TGGATATGATTGATGCCGGTCTGATGGCACCGGGCTATTATGCGGGCA<br>TGGGCTTTGGCGTTCCGGCCGGTATTGGCGCGCAGTGCGTGAGCGG<br>CGGCAAGCGCATTCTGACCGTGGTTGGCGATGGCGCATTTTCAGATGA<br>CTGGCTGGGAGCTGGGTAAGTGTGTCGTCTGGGCATTGATCCGATT<br>GTCATTCTGTTCAACAATGCCAGTTGGGAAATGCTGCGTACCTTTTCAG<br>CCGGAATCTGCCTTTAATGACCTGGACGATTGGCGTTTTGCCGATATG<br>GCGGCGGGTATGGGCGGTGATGGCGTGCGCGTGCGCACCCGTGCC<br>GAACTGAAAGCGGCGCTGGATAAAGCGTTTGCAACCCGCGGCGCT<br>TTCAGTTGATTGAAGCAATGATTCCGCGCGGCGTACTGAGCGATACTC<br>TGCGCGCTTTGTTTCAGGGCCAGAAACGCCTGCATGCGGCACCTCG<br>CGAATAA |
| <i>par</i>   | ATGAGCAATAAAGTGGTGTGCGTGACCGGCGCCAGCGGCTACATTGC<br>GAGCTGGCTGGTGAAACTGCTGCTTCAGCGCGGCTATACCGTGAAAG<br>CGAGCGTGCGCAATCCGAACGATCCGACCAAACCGAACATCTGCTG                                                                                                                                                                                                                                                                                                                                                                                                                                                                                                                                                                                                                                                                                                                                                                                                                                                                                                                                                                                                                                                                                                                                                                                                                                                                                                                                                                                                                                                                                                                                                                                                                                                                                                   |

GCCCTGGATGGCGCGAAAGAACGCCTGCAGCTGTTTAAAGCCGATCT  
 GCTGGAAGAAGGCAGCTTTGATAGCGCCGTGGAAGGTTGCGAAGGC  
 GTGTTTCATACCGCGAGCCCGTTTTATCATGATGTGACCGATCCGAAA  
 GCCGAACTGCTGGACCCGGCAGTGAAAGGCACCCTGAACGTGCTGA  
 ACAGCTGTAGCAAAAGCCCGAGCATTAAACGCGTGGTGCTGACCAGC  
 AGCATTGCGGCGGTGGCGTACAATGGCAAACCGCGCACCCCGGATG  
 TGGTGGTTGATGAGACCTGGTTTACCGATCCGGATGTGTGCAAAGAA  
 AGCAAACCTGTGGTATGTGCTGAGCAAAACCCTGGCCGAAGATGCGGC  
 CTGGAAATTCGTGAAAGAAAAAGGCATTGATATGGTAACCATTAATCCG  
 GCGATGGTGATTGGCCCGCTGCTGCAGCCGACGCTGAACACCAGTG  
 CCGCCGCAATTCTGAACATTATTAAGGCGCGCGCACGTACCCGAAT  
 GCCAGCTTTGGCTGGATTAATGTGAAAGATGTTGCAAATGCGCATGTC  
 CAGGCCTTCGAAATTCCGTCAGCAAGCGGCCGCTACTGCCTGGTGG  
 AACGTGTGGCCCATTTTACCGAAGTGCTGCAGATTATTCACGAACTGT  
 ATCCGGATCTGCAACTGCCGAAAAATGCTCAGATGATAAACCGTTTG  
 TACCGACCTATCAGGTGAGCAAAAGAAAAAGCCAAAAGCCTGGGCATT  
 GAATTTATTCCGCTGGATATTAGCCTGAAAGAAACCATTGAGAGCCTG  
 AAAGAAAAAAGCATTGTGAGCTTTTAA

*synKDC4*

ATGGCGCCGGTGAAACAGGATTTTAAACATCGACGTGCAGACGATCGA  
 AAATACCGACATTAGCCTGTGCGGAATATATTTACCTGCGCATTGCCAG  
 CTGGGTGTGAAAAGCATTTTCGGCGTACCGGGCGATTTTAATCTGAAT  
 CTGGTGGATGAACTGGATAAAGTGCCTCAGCTGAAATGGATTGGCTG  
 CTGCAATGAACTGAACGCGACCTATGCGGCCGATGGCTATGCGAAAG  
 CGAGCGGCACCATTGGCGTGGTGGTAACCACCTACGGCGTGGGCGA  
 ACTGAGCGCGATTAATGGCATTGCCGGCGCGTTTCGCGGAATACGCGC  
 CGGTTCTGCACATTGTGGGCACCAGCGCGATGGCGACCAAACGTCT  
 GGAACATGTTCAACAACATTCACCACCTGGCGGGCAGCAAAAACCTTCC  
 TGGATCGCCCGGATCACTATATTTATGAAAAAATGGTGGATGACATTTG  
 TATTGTGAAAGAGTCTCTGTGCGAAATTGAAATGCGTGTGGTCAGAT  
 TGATAACGCGATTGTGCAGACCTACCTGCTGAGCCGTCCGGGCTATC  
 TGTTCTGCGCGCAACATGGCCACCATGAAAGTGCCGCGTGAACG  
 CCTGTTTAACCAGCCGCTGGCCCTGGAACGCGTGGATCTGCATCCGG  
 GCGAAACCCTGCAGGTGGTCGAAAAAATTCTGGAAAAATTTTATCATG  
 CGAAAGAACC GGCCCTGATTGTGGATTACCTGACCCGCCCGTTTCGC  
 ATGATGGAAAACTGTAGCAAACTGATTGGCGCCCTGGAAAAATAAAGTG  
 AATATTTTCAGCCGTCCGATGAGCAAAGGCTTTGTGGATGAAAGCCAT  
 CCGCGCTATATTGGCTGCTACATTGGCAAACAGAGCAAACATCCGAGC  
 ACCAGCGATATTCTGGAAAAAAGCGACTTTATTCTGAGCGTGGGC  
 ACCTTTGATGTTGAAACCAATAACGGCGGCTTTACCAGCAAACCTGCCG  
 CAGGAGCATCTGGTGGAACTGAACCCTCATTTTACCCGTGTTGGCAC  
 CCAGTGTTTTAGCAATGTTAATATGTGCCATGTCCTGCCGCTGCTGGC  
 GAGCAAACCTGCGTGGCGATCTGATTAGCATGGCCACTGTGCATCCGA  
 ACGATTTTAGCCTGCGCAAAAAAGAAAAAGCGCAGGATAAAATGAAAG



CGCTGAACCAGAGCCATCTGGTTAAAAGCACCGAACTGCTGCTGAAT  
GCGAATGATACCCTGATTGTGGAAACCTGTAGCTTTATGTTGCGGGTG  
CCGGATATTGCGTTTCCGAATAATACCCAGTTTATTAGCCAGAGCTTTT  
ATAATAGCATTGGCTACGCGCTGCCGGCCACCCTGGGCGTGAGCATT  
GCCAAACGCGATTTTCGTAAACCGGGCAAAGTGGTTCTGATTCAGGG  
CGATGGCAGCGCGCAGATGACCATTGAGGAACTGGCGACCATGGTAC  
GCCAGAAAGTGAAACCGACCATTCTGCTGCTGAACAATGAAGGCTAC  
ACCGTGGAACGCATGATCCTGGGTCCGACCAAAGAATATAATGATATT  
GCCCCGAACTGGGATTGGACCGGCATGCTGCGTGCCTTTGGCGATAT  
TCGTGGTCATAGCAAATCCATTAGCATCGATACCTGCGGCCGCTGGA  
TAAGCTGGTACAGACGCGCGAATTCCAGGAACCGACCCATCTGAATTT  
TGTTGAACTGATTCTGGGCCGCATGGATGCCCCGGAACGCTTCGCGA  
ATATGGTTAAAGAGATCGCGAATCTGGAACACGCGAGTAAAAGCATT  
ATTAA

---
